# Supplementary material for: Putting into Practice Domain-Linear Motif Interaction Predictions for Exploration of Protein Networks
Source: PLOS journal article supplement (doi:10.1371/journal.pone.0025376), 2011-11-01
Supplement: S6 (10.1371/journal.pone.0025376.s006) [file journal.pone.0025376.s006]

**Table S2: Filtered numbers of proteins predicted to bind to 1, 2, 3, ... or all PDZ domains of MAGI1 (6 PDZs) or Scribble (4 PDZs)**

| num. domains   | MAGI1 | Scribble |
|----------------|-------|----------|
| 1              | 453   | 145      |
| 2              | 138   | 97       |
| 3 <sup>a</sup> | 103   | 29       |
| 4              | 39    | 68       |
| 5              | 9     | /        |
| 6              | 0     | /        |

<sup>a</sup>e.g. 103 and 29 human proteins were predicted to bind to 3 out of the 6 PDZ domains of MAGI1 and 3 out of the 4 PDZ domains of Scribble, respectively.
